# Supplementary material for: Health-related quality of life issues, including symptoms, in patients with active COVID-19 or post COVID-19; a systematic literature review
Source: Qual Life Res. 2021 Jun 19;30(12):3367–81. doi: 10.1007/s11136-021-02908-z (PMC8214069; doi:10.1007/s11136-021-02908-z)
Supplement: Supplementary file 5 — Supplementary file5 (XLS 71 kb) [file 11136_2021_2908_MOESM5_ESM.xls]

## Sheet: Sheet1
Id	FirstAu	Title	reason
118	Li LQ	COVID‐19 patients' clinical characteristics, discharge rate, and fatality rate of meta‐analysis	Duplicate
139	Lim, Jaegyun	The Author's Response: Case of the Index Patient Who Caused Tertiary Transmission of Coronavirus Disease 2019 in Korea: the A	Duplicate
409	Tang X	Comparison of hospitalized - the same paper as 408	Duplicate
745	Goh, K	(2020a, p1-9) Rapid Progression to Acute Respiratory Distress Syndrome: Review of Current Understanding of Critical Illness from COVID-19 Infection	Duplicate
1024	Chen, G	Clinical and immunologic features in severe and moderate Coronavirus Disease 2019	Duplicate
332	Placais L	COVID-19: Clinical, biological and radiological characteristics in adults, infants and pregnant women	NoEnglish
348	Reina J	The SARS-CoV-2, a new pandemic zoonosis that threatens the world	NoEnglish
501	Goren A	A preliminary observation: Male pattern hair loss among hospitalized COVID-19 patients in Spain - A potential clue to the role of androgens in COVID-19 severity	NoEnglish
602	Reusken C	Rapid assessment of regional SARS-CoV-2 community transmission through a convenience sample of healthcare workers, the Netherlands, March 2020	NoEnglish
941	Boren H	A man in his nineties with fever and dry cough	NoEnglish
1207	Irabien-Ortiz A	Fulminant myocarditis due to COVID-19	NoEnglish
212	Luo H	Surveillance of COVID-19 in the General Population Using an Online Questionnaire: Report From 18,161 Respondents in China	NoVerifiedCOVID19
216	Maassen V	Headache medication and the COVID-19 pandemic (Vol	NoVerifiedCOVID19
304	National Institute for Health and Care Excellence in collaboration with	Managing COVID-19 symptoms (including at the end of life	NoVerifiedCOVID19
308	Nguyen HC	People with Suspected COVID-19 Symptoms Were More Likely Depressed and Had Lower Health-Related Quality of Life: The Potential Benefit of Health Literacy	NoVerifiedCOVID19
317	Ozma M	Clinical manifestation, diagnosis, prevention and control of SARS-CoV-2 (COVID-19) during the outbreak period	NoVerifiedCOVID19
326	Pearson C	Coping with Covid-19	NoVerifiedCOVID19
329	Phan T	Novel coronavirus: From discovery to clinical diagnostics	NoVerifiedCOVID19
330	Philip M	Joint Guidance from SGEI, ISG and INASL for Gastroenterologists and Gastrointestinal Endoscopists on the Prevention, Care, and Management of Patients With COVID-19	NoVerifiedCOVID19
336	Pulvirenti F	Health-Related Quality of Life in Common Variable Immunodeficiency Italian Patients Switched to Remote Assistance During the COVID-19 Pandemic	NoVerifiedCOVID19
341	Rabb H	Kidney diseases in the time of COVID-19: major challenges to patient care	NoVerifiedCOVID19
342	Rada GV	Evidence synthesis relevant to COVID-19: a protocol for multiple systematic reviews and overviews of systematic reviews	NoVerifiedCOVID19
343	Ralli	Defining the burden of olfactory dysfunction in COVID-19 patients	NoVerifiedCOVID19
344	Ramesh	Tackling Corona Virus Disease 2019 (COVID 19	NoVerifiedCOVID19
345	Rasmussen	Coronavirus Disease 2019 (COVID-19	NoVerifiedCOVID19
346	Razai	Coronavirus disease 2019 (covid-19	NoVerifiedCOVID19
539	Yan Y	The First 75 Days of Novel Coronavirus	NoVerifiedCOVID19
702	Du, H	Traditional Chinese Medicine: an effective treatment for 2019 novel coronavirus pneumonia (NCP)	NoVerifiedCOVID19
705	Duca, A	Calculated Decisions: Brescia-COVID Respiratory Severity Scale (BCRSS)/Algorithm	NoVerifiedCOVID19
706	Dzieciatkowski, T	COVID-19 challenge for modern medicine	NoVerifiedCOVID19
713	Eurosurveillance Editorial, T	Latest updates on COVID-19 from the European Centre for Disease Prevention and Control	NoVerifiedCOVID19
715	Fanelli, V	Acute kidney injury in SARS-CoV-2 infected patients	NoVerifiedCOVID19
716	Fang, L	Are patients with hypertension and diabetes mellitus at increased risk for COVID-19 infection? The Lancet	NoVerifiedCOVID19
717	Feng, G	COVID-19 and Liver Dysfunction: Current Insights and Emergent Therapeutic Strategies	NoVerifiedCOVID19
719	Ferner, R	Chloroquine and hydroxychloroquine in covid-19	NoVerifiedCOVID19
721	Finsterer, J	Causes of hypogeusia/hyposmia in SARS-CoV2 infected patients	NoVerifiedCOVID19
722	Fiorillo, A	The consequences of the COVID-19 pandemic on mental health and implications for clinical practice	NoVerifiedCOVID19
724	Ford, N	Systematic review of the efficacy and safety of antiretroviral drugs against SARS, MERS or COVID-19: initial assessment	NoVerifiedCOVID19
725	Freitas, A	Assessing the severity of COVID-19	NoVerifiedCOVID19
728	Fusi-Schmidhauser, T	Conservative Management of COVID-19 Patients-Emergency Palliative Care in Action	NoVerifiedCOVID19
729	Gabutti, G	Coronavirus: Update Related to the Current Outbreak of COVID-19	NoVerifiedCOVID19
732	Gao, J	Breakthrough: Chloroquine phosphate has shown apparent efficacy in treatment of COVID-19 associated pneumonia in clinical studies	NoVerifiedCOVID19
733	Garg, D	The Challenge of Managing Parkinson's Disease Patients during the COVID-19 Pandemic	NoVerifiedCOVID19
735	Gattinoni, L	COVID-19 pneumonia: different respiratory treatments for different phenotypes? Intensive Care Medicine	NoVerifiedCOVID19
736	Gattinoni, L	Covid-19 Does Not Lead to a "Typical" Acute Respiratory Distress Syndrome	NoVerifiedCOVID19
737	Gautier, J	A New Symptom of COVID-19: Loss of Taste and Smell	NoVerifiedCOVID19
739	Gengler, I	Sinonasal pathophysiology of SARS-CoV-2 and COVID-19: A systematic review of the current evidence	NoVerifiedCOVID19
743	Giwa, A	Novel coronavirus COVID-19: an overview for emergency clinicians	NoVerifiedCOVID19
747	Gong, K	Internet Hospitals Help Prevent and Control the Epidemic of COVID-19 in China: Multicenter User Profiling Study	NoVerifiedCOVID19
748	Gonzalez-Jaramillo, N	The double burden of disease of COVID-19 in cardiovascular patients: overlapping conditions could lead to overlapping treatments	NoVerifiedCOVID19
801	Grant, W	Evidence that Vitamin D Supplementation Could Reduce Risk of Influenza and COVID-19 Infections and Deaths.	NoVerifiedCOVID19
807	Guo, Y	The origin, transmission and clinical therapies on coronavirus disease 2019 (COVID-19) outbreak - an update on the status.	NoVerifiedCOVID19
809	Gupta, R	Contentious issues and evolving concepts in the clinical presentation and management of patients with COVID-19 infectionwith reference to use of therapeutic and other drugs used in Co-morbid diseases (Hypertension, diabetes etc).	NoVerifiedCOVID19
811	Habibzadeh, P	The Novel Coronavirus: A Bird's Eye View.	NoVerifiedCOVID19
812	Hajifathalian, K	SARS-COV-2 infection (coronavirus disease 2019) for the gastrointestinal consultant.	NoVerifiedCOVID19
814	Han, Q	Coronavirus 2019-nCoV: A brief perspective from the front line.	NoVerifiedCOVID19
822	Hassan, S	Coronavirus (COVID-19): A Review of Clinical Features, Diagnosis, and Treatment.	NoVerifiedCOVID19
823	Hatipoğlu, N	The "New" Problem of Humanity	NoVerifiedCOVID19
824	He, F	Coronavirus disease 2019: What we know?	NoVerifiedCOVID19
833	Hill, B	Coronavirus: origins, signs, prevention and management of patients.	NoVerifiedCOVID19
835	Ho, H	What do urologists need to know: Diagnosis, treatment, and follow-up during COVID-19 pandemic.	NoVerifiedCOVID19
838	Hopkins, C	Presentation of new onset anosmia during the COVID-19 pandemic.	NoVerifiedCOVID19
907	Ali F	Non-cutaneous considerations of COVID19 for dermatology practices	NoVerifiedCOVID19
911	Ambrosi P	Comment on "Epidemiological and clinical characteristics of heart transplant recipients during the 2019 coronavirus outbreak in Wuhan, China" by Ren et al	NoVerifiedCOVID19
1005	Carr AC	A new clinical trial to test high-dose vitamin C in patients with COVID-19	NoVerifiedCOVID19
1007	Carver PE	Novel Coronavirus (COVID-19) - What you need to know	NoVerifiedCOVID19
1008	Ceccarelli M	Editorial – Differences and similarities between Severe Acute Respiratory Syndrome (SARS)-CoronaVirus (CoV) and SARS-CoV-2.	NoVerifiedCOVID19
1009	ÇElebioĞLu, E	Asthma and COVID-19	NoVerifiedCOVID19
1011	Ceravalo M	Systematic rapid "living" review on rehabilitation needs due to covid-19: update to march 31st 2020	NoVerifiedCOVID19
1017	Chen Yu	Maternal health care management during the outbreak of coronavirus disease 2019	NoVerifiedCOVID19
1123	Zhang Y	Impact of the COVID-19 Pandemic on Mental Health and Quality of Life among Local Residents in Liaoning Province, China: A Cross-Sectional Study	NoVerifiedCOVID19
1232	Khairat S	Interpreting COVID-19 and Virtual Care Trends: Cohort Study	NoVerifiedCOVID19
102	Lai THT	Stepping up infection control measures in ophthalmology during the novel coronavirus outbreak:	NoEmpiricalData
111	Li G	Therapeutic options for the 2019 novel coronavirus (2019-nCoV)	NoEmpiricalData
113	Li Ji	Novel Coronavirus disease 2019 (COVID-19): The importance of recognising possible early ocular manifestation and using protective eyewear	NoEmpiricalData
114	Li Jin-Yan	The epidemic of 2019-novel-coronavirus (2019-nCoV) pneumonia and insights for emerging	NoEmpiricalData
116	Li Lin	Follow-Up Information About the Four Pregnant Patients With Coronavirus Disease (COVID-19)	NoEmpiricalData
120	Li Qun	Early Transmission Dynamics in Wuhan, China, of Novel Coronavirus-Infected Pneumonia	NoEmpiricalData
123	Li, Taisheng	Diagnosis and clinical management of severe acute respiratory syndrome Coronavirus 2 (SARS-CoV-2)	NoEmpiricalData
124	Li, Taisheng	Clinical observation and management of COVID-19 patients	NoEmpiricalData
125	Li, Xun	Clinical characteristics of 25 death cases with COVID-19: a retrospective review of medical records in a single medical center, Wuhan, China	NoEmpiricalData
129	Li, Y. C.	The neuroinvasive potential of SARS-CoV2 may be at least partially responsible for the respiratory failure of COVID-19 patients	NoEmpiricalData
130	Li, Y. C.	The neuroinvasive potential of SARS-CoV2 may play a role in the respiratory failure of COVID-19 patients	NoEmpiricalData
133	Liang, Huan	Novel corona virus disease (COVID-19) in pregnancy: What clinical recommendations to follow?	NoEmpiricalData
136	Liang, Wenhua	Cancer patients in SARS-CoV-2 infection: a nationwide analysis in China	NoEmpiricalData
206	Lombardy Section Italian Society, Infectious Tropical, Diseases	Vademecum for the treatment of people with COVID-19. Edition 2.0, 13 March 2020	NoEmpiricalData
208	Lovato A	Sore throat in COVID-19: Comment on "Clinical characteristics of hospitalized patients with SARS-CoV-2 infection: A single arm meta-analysis"	NoEmpiricalData
215	Ma RC	COVID-19 and diabetes	NoEmpiricalData
220	Mahony R	Pregnancy and Sars-Cov-2: A Novel Virus in a Unique Population	NoEmpiricalData
222	Marinosci	Possible link between anosmia and COVID-19: sniffing out the truth	NoEmpiricalData
224	Mash	Primary care management of the coronavirus (COVID-19	NoEmpiricalData
226	McCullough	Urgent need for individual mobile phone and institutional reporting of at home, hospitalized, and intensive care unit cases of SARS-CoV-2 (COVID-19	NoEmpiricalData
228	Md Insiat Islam	Current Drugs with Potential for Treatment of COVID-19: A Literature Review	NoEmpiricalData
229	Mendes	Research towards treating COVID-19	NoEmpiricalData
240	Moore	Chloroquine for COVID-19 Infection	NoEmpiricalData
242	Morley	COVID-19 and Older Adult	NoEmpiricalData
243	Morley	Editorial: COVID-19 and Older Adults	NoEmpiricalData
244	Mubarak	Covid-19 nephropathy; an emerging condition caused by novel coronavirus infection	NoEmpiricalData
246	Mungroo	Novel Coronavirus: Current Understanding of Clinical Features, Diagnosis, Pathogenesis, and Treatment Options	NoEmpiricalData
247	Musa	Hepatic and gastrointestinal involvement in coronavirus disease 2019 (COVID-19	NoEmpiricalData
248	Mustafa	Audiological profile of asymptomatic Covid-19 PCR-positive cases	NoEmpiricalData
249	Myint	Possible treatment of Covid-19 with a therapeutic vaccine	NoEmpiricalData
301	Nahama	The role of afferent pulmonary innervation in poor prognosis of acute respiratory distress syndrome in COVID-19 patients and proposed use of resiniferatoxin (RTX	NoEmpiricalData
302	Namendys-Silva	Respiratory support for patients with COVID-19 infection	NoEmpiricalData
303	Naserghandi A	All about COVID-19 in brief	NoEmpiricalData
306	Ng S	COVID-19 and the gastrointestinal tract: More than meets the eye	NoEmpiricalData
307	Ng Y	Evaluation of the Effectiveness of Surveillance and Containment Measures for the First 100 Patients with COVID-19 in Singapore - January 2-February 29, 2020	NoEmpiricalData
315	Ong J	COVID-19 in gastroenterology: A clinical perspective	NoEmpiricalData
318	Pal M	Severe Acute Respiratory Syndrome Coronavirus-2 (SARS-CoV-2): An Update	NoEmpiricalData
322	Park	Epidemiology, virology, and clinical features of severe acute respiratory syndrome -coronavirus-2 (SARS-CoV-2; Coronavirus Disease-19	NoEmpiricalData
323	Patlas	COVID-19: What Can We Learn From Stories From the Trenches? Canadian Association of Radiologists journal = Journal l'Association canadienne des radiologistes, 71(2	NoEmpiricalData
324	Paules	Coronavirus Infections-More Than Just the Common Cold	NoEmpiricalData
402	Sun P	Response to: Sore throat in COVID-19: comment on "Clinical characteristics of hospitalized patients with SARS-CoV-2 infection: A single arm meta-analysis"	NoEmpiricalData
403	Swiss Academy Of Medical, Sciences	COVID-19 pandemic: triage for intensive-care treatment under resource scarcity	NoEmpiricalData
404	Swiss Society Of Intensive Care, Medicine	Recommendations for the admission of patients with COVID-19 to intensive care and intermediate care units (ICUs and IMCUs)	NoEmpiricalData
405	Tan L	Lymphopenia predicts disease severity of COVID-19: a descriptive and predictive study	NoEmpiricalData
406	Tan W	The cardiovascular burden of coronavirus disease 2019 (COVID-19) with a focus on congenital heart disease	NoEmpiricalData
414	Team, Covid- National Incident Room Surveillance	COVID-19, Australia: Epidemiology Report 3 (Reporting week ending 19:00 AEDT 15 February 2020)	NoEmpiricalData
415	Team, Covid- National Incident Room Surveillance	COVID-19, Australia: Epidemiology Report 4 (Reporting week ending 19:00 AEDT 22 February 2020)	NoEmpiricalData
420	Team, Cdc Covid- Response	reliminary Estimates of the Prevalence of Selected Underlying Health Conditions Among Patients with Coronavirus Disease 2019 - United States, February 12-March 28, 2020	NoEmpiricalData
421	Team, Cdc Covid- Response	Severe Outcomes Among Patients with Coronavirus Disease 2019 (COVID-19) - United States, February 12-March 16, 2020	NoEmpiricalData
422	The Lancet	COVID-19: learning from experience	NoEmpiricalData
423	Thompson R	Pandemic potential of 2019-nCoV	NoEmpiricalData
426	Tolia, V. M	Preliminary Results of Initial Testing for Coronavirus (COVID-19) in the Emergency Department	NoEmpiricalData
429	Tummers J	Coronaviruses and people with intellectual disability: An exploratory data analysis	NoEmpiricalData
433	Vetter, P	Clinical features of covid-19.	NoEmpiricalData
435	Vinayachandran, D.,	Is Gustatory Impairment the First Report of an Oral Manifestation in COVID-19?	NoEmpiricalData
440	Wang, H.,	COVID-19 infection epidemic: the medical management strategies in Heilongjiang Province, China	NoEmpiricalData
441	Wang, H. Y.,	Potential neurological symptoms of COVID-19	NoEmpiricalData
444	Wang, L.-S.,	A review of the 2019 Novel Coronavirus (COVID-19) based on current evidence	NoEmpiricalData
505	Wang Y	Unique epidemiological and clinical features of the emerging 2019 novel coronavirus pneumonia (COVID-19) implicate special control measures	NoEmpiricalData
511	Weiss P	Clinical course and mortality risk of severe COVID-19	NoEmpiricalData
512	Weiss SR	Forty years with coronaviruses	NoEmpiricalData
513	Weston S	COVID-19: Knowns, Unknowns, and Questions	NoEmpiricalData
514	Whitworth J	COVID-19: a fast evolving pandemic	NoEmpiricalData
515	Wollina U	Challenges of COVID‐19 pandemic for dermatology	NoEmpiricalData
516	Wong SH	Covid-19 and the digestive system	NoEmpiricalData
518	Wood C	Infections without borders: a new coronavirus in Wuhan, China	NoEmpiricalData
524	Wujtewicz M	COVID-19 - what should anaethesiologists and intensivists know about it?	NoEmpiricalData
525	Wujtewicz MA	COVID-19 - what should anaethesiologists and intensivists know about it?	NoEmpiricalData
528	Xie J	Clinical Characteristics of Patients Who Died of Coronavirus Disease 2019 in China	NoEmpiricalData
529	Xie M	Insight into 2019 novel coronavirus - an updated intrim review and lessons from SARS-CoV and MERS-CoV	NoEmpiricalData
531	Xu B	Epidemiological data from the COVID-19 outbreak, real-time case information	NoEmpiricalData
532	Xu J	Systematic Comparison of Two Animal-to-Human Transmitted Human Coronaviruses: SARS-CoV-2 and SARS-CoV	NoEmpiricalData
536	Xydakis MS	Smell and taste dysfunction in patients with COVID-19	NoEmpiricalData
603	Richardson P	Baricitinib as potential treatment for 2019-nCoV acute respiratory disease	NoEmpiricalData
605	Richez C	Implications of COVID-19 for the management of patients with inflammatory rheumatic diseases	NoEmpiricalData
610	Romanelli A	Immunosuppression drug-related and clinical manifestation of Coronavirus disease 2019: a therapeutical hypothesis	NoEmpiricalData
611	Rombola G	Practical indications for the prevention and management of SARS-CoV-2 in ambulatory dialysis patients: lessons from the first phase of the epidemics in Lombardy	NoEmpiricalData
612	Rothan H	The epidemiology and pathogenesis of coronavirus disease (COVID-19) outbreak	NoEmpiricalData
615	Russell CD	Clinical evidence does not support corticosteroid treatment for 2019-nCoV lung injury	NoEmpiricalData
619	Seah I	Can the Coronavirus Disease 2019 (COVID-19) Affect the Eyes? A Review of Coronaviruses and Ocular Implications in Humans and Animals	NoEmpiricalData
620	Sellner J	The need for neurologists in the care of COVID-19 patients	NoEmpiricalData
622	Shaikh A	Cerebellar Scholars' Challenging Time in COVID-19 Pandemia	NoEmpiricalData
624	Shi B	Severe Pneumonia Due to SARS-CoV-2 and Respiratory Syncytial Virus Infection: A Case Report	NoEmpiricalData
630	Sifuentes-Rodriguez E	COVID-19: The outbreak caused by a new coronavirus	NoEmpiricalData
632	Singhal T	A Review of Coronavirus Disease-2019 (COVID-19).	NoEmpiricalData
634	Slawinski G	What should a cardiologist know about coronavirus disease 2019?	NoEmpiricalData
635	Sohrabi C	World Health Organization declares global emergency: A review of the 2019 novel coronavirus (COVID-19)	NoEmpiricalData
643	Stam H	Covid-19 and Post Intensive Care Syndrome: A Call for Action	NoEmpiricalData
644	Stein M.B.	EDITORIAL: COVID-19 and Anxiety and Depression in 2020	NoEmpiricalData
645	Steinberg E.	Calculated decisions: COVID-19 calculators during extreme resource-limited situations	NoEmpiricalData
646	Stevens A.M.H.	Lessons from covid-19: Visiting patients at home and assessing comorbidities	NoEmpiricalData
829	Heinzerling, A	Transmission of COVID-19 to Health Care Personnel During Exposures to a Hospitalized Patient - Solano County, California, February 2020.	NoEmpiricalData
830	Hendren, N	Description and Proposed Management of the Acute COVID-19 Cardiovascular Syndrome.	NoEmpiricalData
901	Abduljalil	Epidemiology, genome, and clinical features of the pandemic SARS-CoV-2: a recent view	NoEmpiricalData
902	Abramovitz	Dental care during the coronavirus disease 2019 (COVID-19) outbreak: operatory considerations and clinical aspects	NoEmpiricalData
905	Ahn	Current Status of Epidemiology, Diagnosis, Therapeutics, and Vaccines for Novel Coronavirus Disease 2019 (COVID-19)	NoEmpiricalData
914	anonymous	Stop the coronavirus stigma now	NoEmpiricalData
920	Atri	COVID-19 for the Cardiologist: A Current Review of the Virology, Clinical Epidemiology, Cardiac and Other Clinical Manifestations and Potential Therapeutic Strategies	NoEmpiricalData
925	Baig	Neurological manifestations in COVID-19 caused by SARS-CoV-2	NoEmpiricalData
927	Bansal	Cardiovascular disease and COVID	NoEmpiricalData
932	Bermejo-Martin	Lymphopenic community acquired pneumonia as signature of severe COVID-19 infection	NoEmpiricalData
936	Bhoori	COVID-19 in long-term liver transplant patients: preliminary experience from an Italian transplant centre in Lombardy	NoEmpiricalData
938	Borba	Effect of High vs Low Doses of Chloroquine Diphosphate as Adjunctive Therapy for Patients Hospitalized With Severe Acute Respiratory Syndrome Coronavirus 2 (SARS-CoV-2) Infection: A Randomized Clinical Trial	NoEmpiricalData
940	Bordl	Differential diagnosis of illness in patients under investigation for the novel coronavirus (SARS-CoV-2), Italy, February 2020	NoEmpiricalData
945	Cabrini	Minimise nosocomial spread of 2019-nCoV when treating acute respiratory failure	NoEmpiricalData
947	Cai	Sex difference and smoking predisposition in patients with COVID-19	NoEmpiricalData
948	Recasens	Lack of dyspnea in patients with Covid-19: another neurological conundrum?	NoEmpiricalData
1026	Cheng	2019 Novel coronavirus: where we are and what we know	NoEmpiricalData
1029	Cinesi Gomez	Clinical consensus recommendations regarding non-invasive respiratory support in the adult patient with acute respiratory failure secondary to SARS-CoV-2 infection	NoEmpiricalData
1030	Columbus	2019 novel coronavirus: an emerging global threat	NoEmpiricalData
1032	Connors	Thromboinflammation and the hypercoagulability of COVID-19	NoEmpiricalData
1036	De Felice FG	Severe Acute Respiratory Syndrome Coronavirus 2	NoEmpiricalData
1037	de Lusignan S	Protocol for Extending Surveillance Used by the Royal College	NoEmpiricalData
1038	Deftereos SG	The Greek study in the effects of colchicine in COvid-19 complications prevention (GRECCO-19 study): Rationale and study design	NoEmpiricalData
1039	Del Rio C, Malani PN	2019 Novel Coronavirus—Important Information for Clinicians	NoEmpiricalData
1044	Di Gennaro F	Coronavirus Diseases (COVID-19) Current Status and Future Perspectives	NoEmpiricalData
1103	Sun	Early epidemiological analysis of the coronavirus disease 2019 outbreak based on crowdsourced data: a population-level observational study	NoEmpiricalData
1107	Zavaleta	COVID-19: review Indigenous peoples' data	NoEmpiricalData
1109	Zhang	Liver injury in COVID-19: management and challenges	NoEmpiricalData
1111	Zhang	Analysis of clinical characteristics and laboratory findings of 95 cases of 2019 novel coronavirus pneumonia in Wuhan, China: a retrospective analysis	NoEmpiricalData
1116	Zhang	Therapeutic and triage strategies for 2019 novel coronavirus disease in fever clinics	NoEmpiricalData
1117	Zhang	Potential interventions for novel coronavirus in China: A systematic review	NoEmpiricalData
1119	Zhang	Clinical trial analysis of 2019-nCoV therapy registered in China	NoEmpiricalData
1121	Zhang	COVID-19: Melatonin as a potential adjuvant treatment	NoEmpiricalData
1124	Zhang	Emergence of SARS-like coronavirus in China: An update	NoEmpiricalData
1131	Zheng	COVID-19 and the cardiovascular system	NoEmpiricalData
1133	Zhou	The clinical characteristics of myocardial injury in severe and very severe patients with 2019 novel coronavirus disease	NoEmpiricalData
1137	Zhou	Primary stratification and identification of suspected Corona virus disease 2019 (COVID-19	NoEmpiricalData
1138	Zhou	The Role of Telehealth in Reducing the Mental Health Burden from COVID-19	NoEmpiricalData
1145	Zu	Coronavirus Disease 2019 (COVID-19	NoEmpiricalData
1146	Zumla	Reducing mortality from 2019-nCoV: host-directed therapies should be an option	NoEmpiricalData
1147	Zwald	Rapid Sentinel Surveillance for COVID-19 - Santa Clara County, California, March 2020	NoEmpiricalData
1203	Hulot	COVID-19 in patients with cardiovascular diseases	NoEmpiricalData
1205	Hussain	COVID-19 and diabetes: Knowledge in progress	NoEmpiricalData
1208	Jamaati	A fourteen-day experience with coronavirus disease 2019 (COVID-19	NoEmpiricalData
1211	Jiang	Psychological crisis intervention during the outbreak period of new coronavirus pneumonia from experience in Shanghai	NoEmpiricalData
1213	Jin	Consensus for prevention and management of coronavirus disease 2019 (COVID-19	NoEmpiricalData
1217	Jin	A rapid advice guideline for the diagnosis and treatment of 2019 novel coronavirus (2019-nCoV	NoEmpiricalData
1220	Joob	COVID-19 pneumonia in Taiwan	NoEmpiricalData
1222	Jordan	Covid-19: risk factors for severe disease and death	NoEmpiricalData
1224	Kabbani	Does COVID19 infect the brain? If so, smokers might be at a higher risk	NoEmpiricalData
1225	Kakodkar	A Comprehensive Literature Review on the Clinical Presentation, and Management of the Pandemic Coronavirus Disease 2019 (COVID-19	NoEmpiricalData
1226	Kang	Recent progress in understanding 2019 novel coronavirus (SARS-CoV-2	NoEmpiricalData
1229	Kavoor	COVID-19 in People with Mental Illness: Challenges and Vulnerabilities	NoEmpiricalData
1230	Keith	A novel treatment approach to the novel coronavirus: an argument for the use of therapeutic plasma exchange for fulminant COVID-19	NoEmpiricalData
1231	Keyhan	Dysosmia and dysgeusia due to the 2019 Novel Coronavirus; a hypothesis that needs further investigation	NoEmpiricalData
1233	Khedkar	SARS-CoV-2: What do we know so far? Acta Physiologica (Oxford, England	NoEmpiricalData
1235	Khot	The 2019 Novel Coronavirus Outbreak - A Global Threat	NoEmpiricalData
1236	Khurshid	Human Saliva: Non-Invasive Fluid for Detecting Novel Coronavirus (2019-nCoV	NoEmpiricalData
1237	Kiekens	Rehabilitation and respiratory management in the acute and early post-acute phase	NoEmpiricalData
1240	Kim	Letter to the Editor: Case of the Index Patient Who Caused Tertiary Transmission of Coronavirus Disease 2019 in Korea: the Application of Lopinavir/Ritonavir for the Treatment of COVID-19 Pneumonia Monitored by Quantitative RT-PCR	NoEmpiricalData
1242	Kim	A Brief Telephone Severity Scoring System and Therapeutic Living Centers Solved Acute Hospital-Bed Shortage during the COVID-19 Outbreak in Daegu, Korea	NoEmpiricalData
1245	Kock	2019-nCoV in context: lessons learned? The Lancet	NoEmpiricalData
1246	Korean Society of Infectious	Report on the Epidemiological Features of Coronavirus Disease 2019 (COVID-19) Outbreak in the Republic of Korea from January 19 to March 2, 2020	NoEmpiricalData
1247	Kothai	2019 novel coronavirus: A mysterious threat from Wuhan, China-A current review	NoEmpiricalData
1248	Krajewska	COVID-19 in otolaryngologist practice: a review of current knowledge	NoEmpiricalData
946	Caccialanza	Early nutritional supplementation in non-critically ill patients hospitalized for the 2019 novel coronavirus disease (COVID-19): Rationale and feasibility of a shared pragmatic protocol	Children
127	Li, Xiang-Yu	The occurrence of diarrhea in COVID-19 patients	Biology
607	Rizzo P	COVID-19 in the heart and the lungs: could we "Notch" the inflammatory storm?	Biology
609	Roe K	Explanation for COVID-19 infection neurological damage and reactivations	Biology
614	Russell B	Anosmia and ageusia are emerging as symptoms in patients with COVID-19: What does the current evidence say?	Biology
904	Agarwal	Gastrointestinal and Liver Manifestations of COVID-19	Biology
331	Piva	Clinical presentation and initial management critically ill patients with severe acute respiratory syndrome coronavirus 2 (SARS-CoV-2	ICU
915	Arabi	Critical care management of adults with community-acquired severe respiratory viral infection	ICU
547	Yi Y	COVID-19: what has been learned and to be learned about the novel coronavirus disease	Other
913	anonymous (2)	Clinical findings in a group of patients infected with the 2019 novel coronavirus (SARS-Cov-2) outside of Wuhan, China: Retrospective case series (The BMJ (2020) 368 (m606) DOI:10.1136/bmj.m606)	Other
923	Bae	Author Response: Coronavirus Disease 2019 (COVID-19), Infectivity, and the Incubation Period	Other
926	Bajema	Persons Evaluated for 2019 Novel Coronavirus - United States, January 2020	Other
1035	Das G, Mukherjee N	Neurological Insights of COVID-19 Pandemic	Other
